# Supplementary material for: Design, Synthesis, and Structural Characterization of Novel Diazaphenothiazines with 1,2,3-Triazole Substituents as Promising Antiproliferative Agents
Source: PubMed Central journal article supplement (PMC6930555; doi:10.3390/molecules24234388), 2019-11-30
Supplement: molecules-24-04388-s001.pdf [file molecules-24-04388-s001.pdf]

# Supplementary Material

## Design, synthesis, structural characterization of novel diazaphenothiazines with 1,2,3-triazole substituents as promising anticancer agents #

Beata Morak-Młodawska<sup>1\*</sup>, Krystian Pluta<sup>1</sup>, Małgorzata Latocha<sup>2</sup>, Małgorzata Jeleń<sup>1</sup>,  
Dariusz Kuśmierz<sup>2</sup>

<sup>1</sup>The Medical University of Silesia, Faculty of Pharmaceutical Sciences, Department of Organic Chemistry, Jagiellońska 4, 41-200 Sosnowiec, Poland,

<sup>2</sup>The Medical University of Silesia, Faculty of Pharmaceutical Sciences, Department of Cell Biology, Jedności 8, 41-200 Sosnowiec, Poland.

|                                                                                                                             |   |
|-----------------------------------------------------------------------------------------------------------------------------|---|
| Content                                                                                                                     | 1 |
| 1. <sup>1</sup> H NMR of 10-[(1-Benzyl-1H-1,2,3-triazol-4-yl)-methyl]-1,6-diazaphenothiazine ( <b>1d</b> )                  | 2 |
| 2. <sup>1</sup> H NMR of the compound ( <b>9</b> ) – aromatic part                                                          | 3 |
| 3. COSY NMR of 10-[(1-Benzyl-1H-1,2,3-triazol-4-yl)-methyl]-1,6-diazaphenothiazine ( <b>1d</b> )                            | 4 |
| 4. ROESY NMR of 10-[(1-Benzyl-1H-1,2,3-triazol-4-yl)-methyl]-1,6-diazaphenothiazine ( <b>1d</b> )                           | 5 |
| 5. ROESY NMR of 10-[(1-Benzyl-1H-1,2,3-triazol-4-yl)-methyl]-1,6-diazaphenothiazine ( <b>1d</b> ) – aromatic part           | 6 |
| 6. <sup>13</sup> C NMR of 10-[(1-Benzyl-1H-1,2,3-triazol-4-yl)-methyl]-1,6-diazaphenothiazine ( <b>1d</b> )                 | 7 |
| 7. <sup>13</sup> C NMR of 10-[(1-Benzyl-1H-1,2,3-triazol-4-yl)-methyl]-1,6-diazaphenothiazine ( <b>1d</b> ) – aromatic part | 8 |
| 8. 8. HR MS of 10-[(1-Benzyl-1H-1,2,3-triazol-4-yl)-methyl]-1,6-diazaphenothiazine ( <b>1d</b> )                            | 9 |

1. <sup>1</sup>H NMR of 10-[(1-Benzyl-1H-1,2,3-triazol-4-yl)-methyl]-1,6-diazaphenothiazine (**1d**)

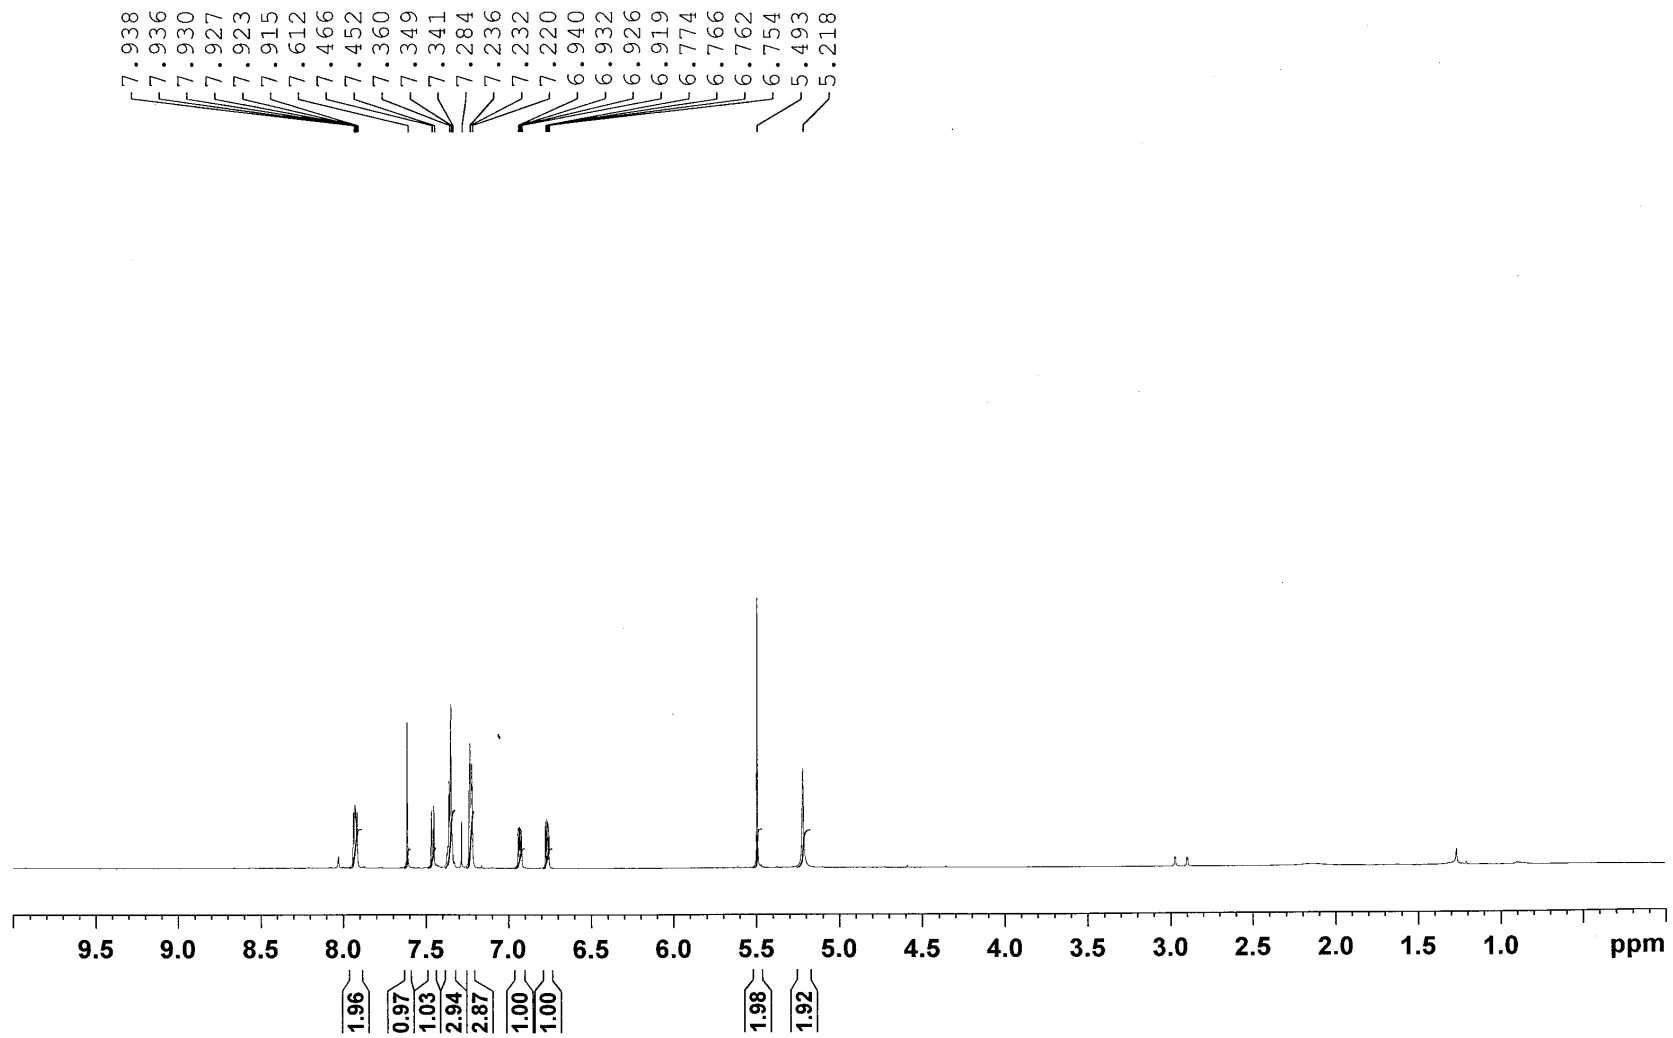

2.  $^1\text{H}$  NMR of the compound (**1d**) – aromatic part

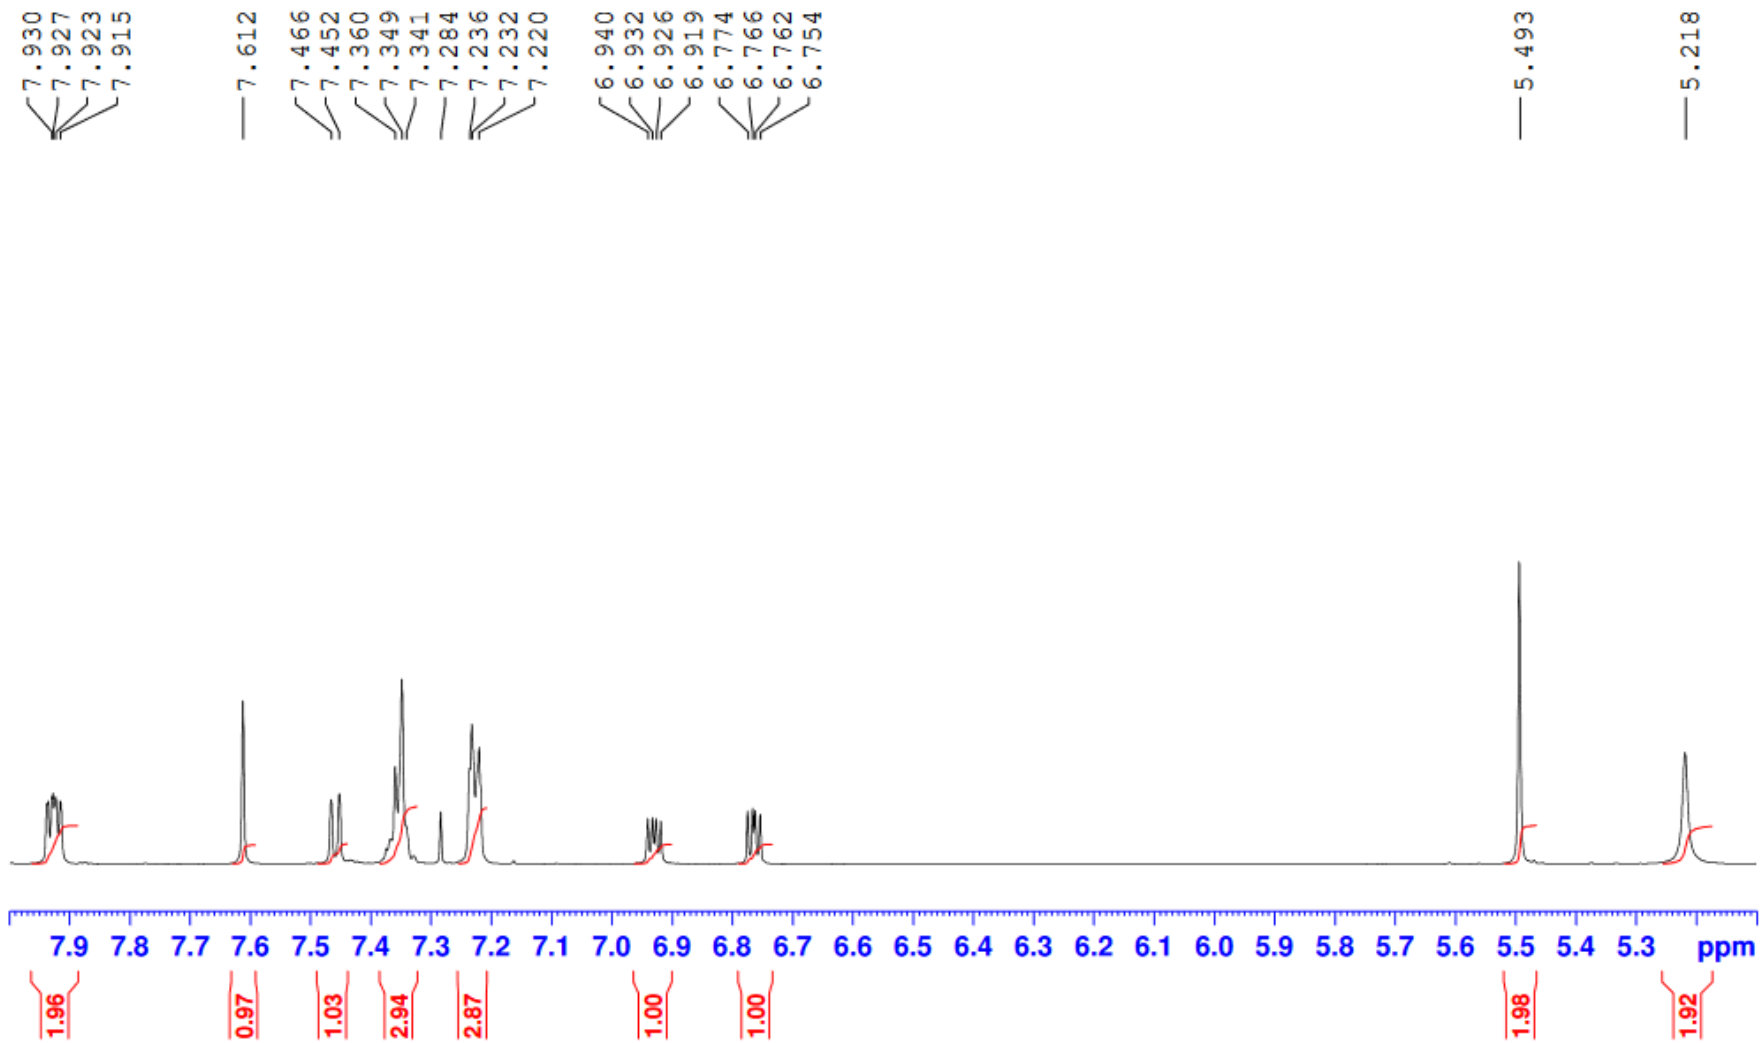

3. COSY NMR of 10-[(1-Benzyl-1H-1,2,3-triazol-4-yl)-methyl]-1,6-diazaphenothiazine (**1d**)

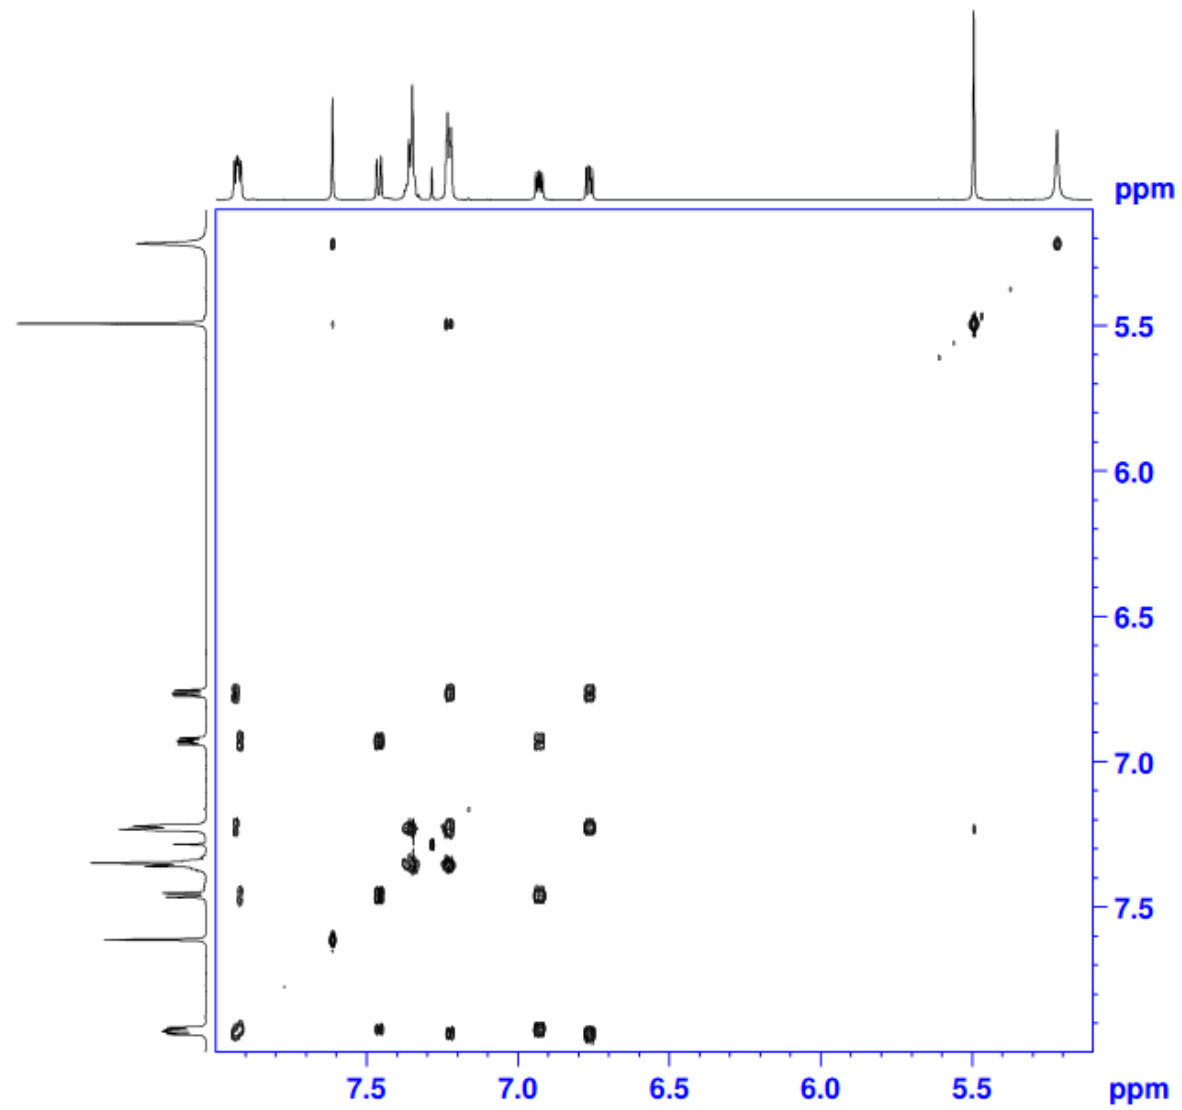

4. ROESY NMR of 10-[(1-Benzyl-1H-1,2,3-triazol-4-yl)-methyl]-1,6-diazaphenothiazine (**1d**)

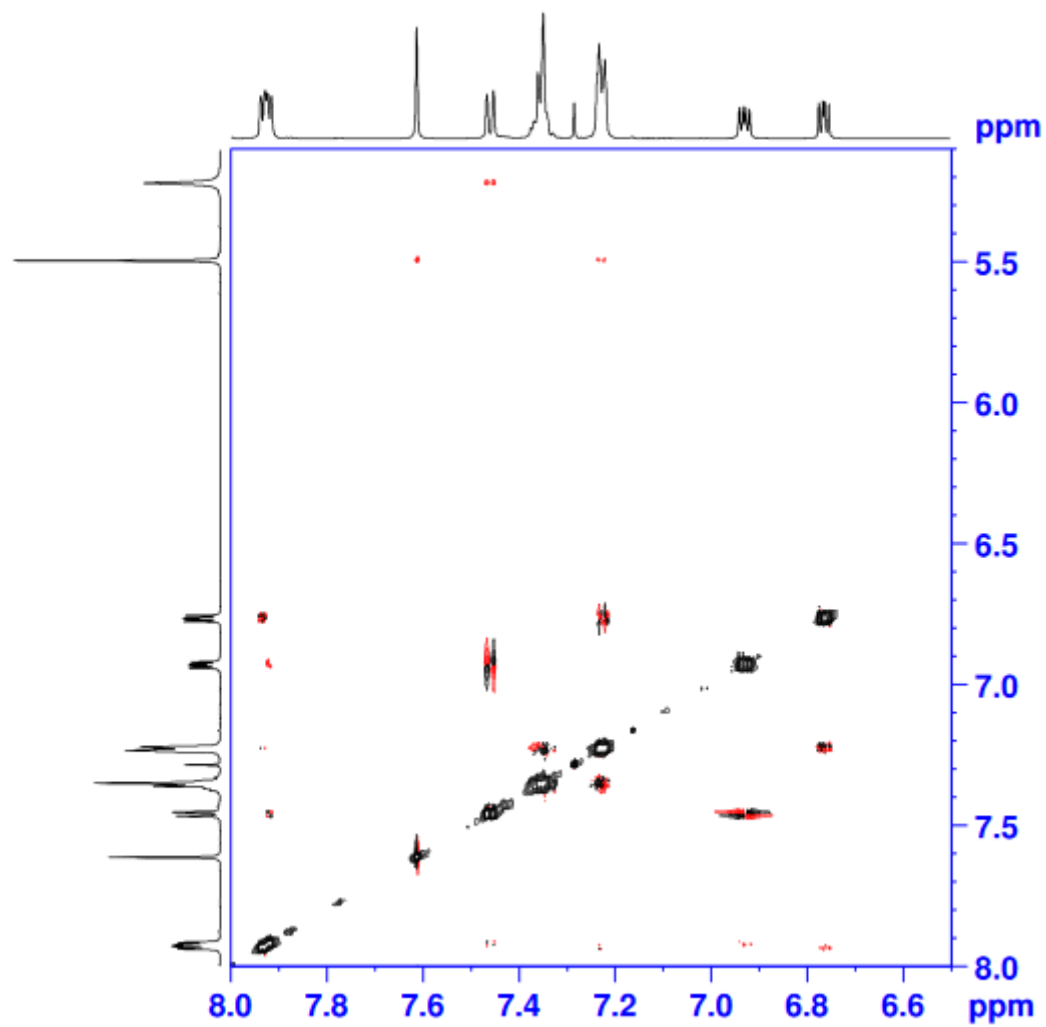

5. ROESY NMR of 10-[(1-Benzyl-1H-1,2,3-triazol-4-yl)-methyl]-1,6-diazaphenothiazine (**1d**) – aromatic part

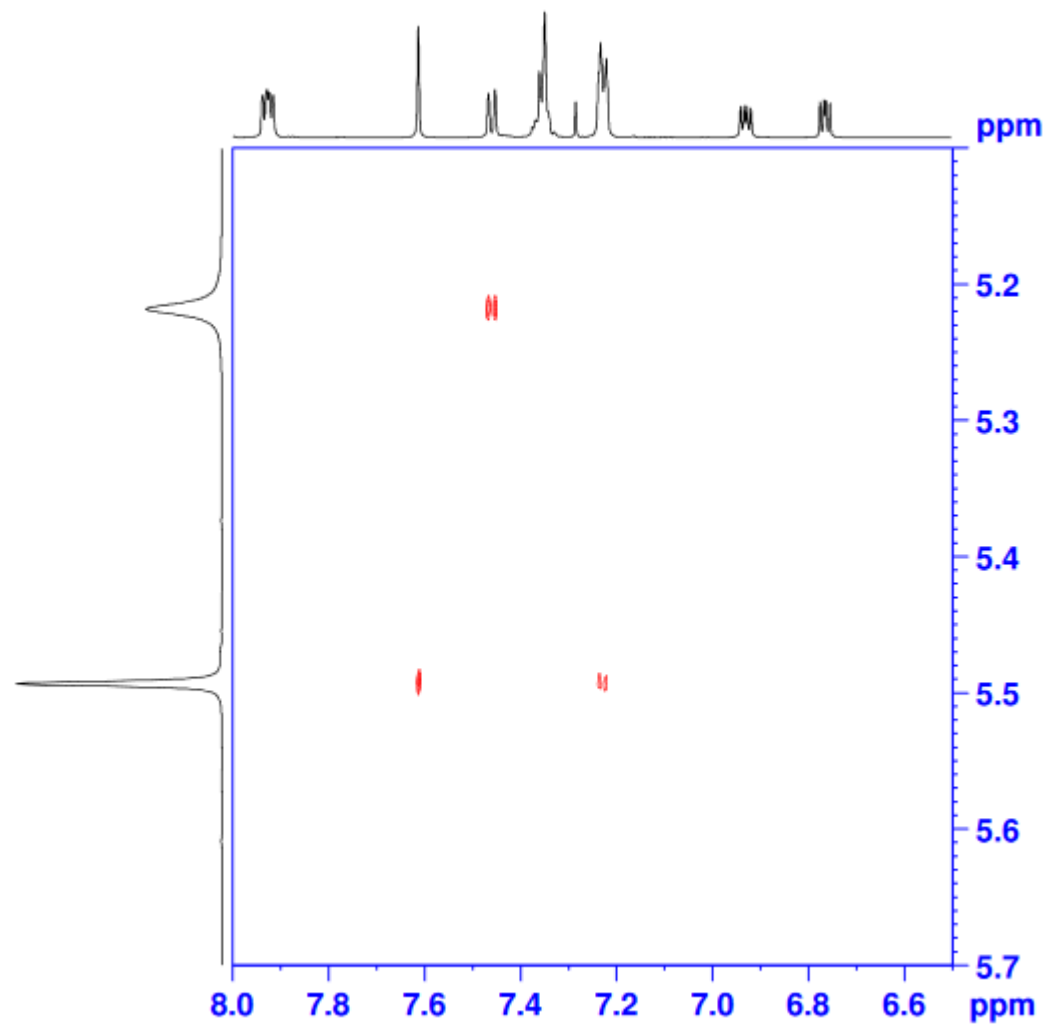

6.  $^{13}\text{C}$  NMR of 10-[(1-Benzyl-1H-1,2,3-triazol-4-yl)-methyl]-1,6-diazaphenothiazine (**1d**)

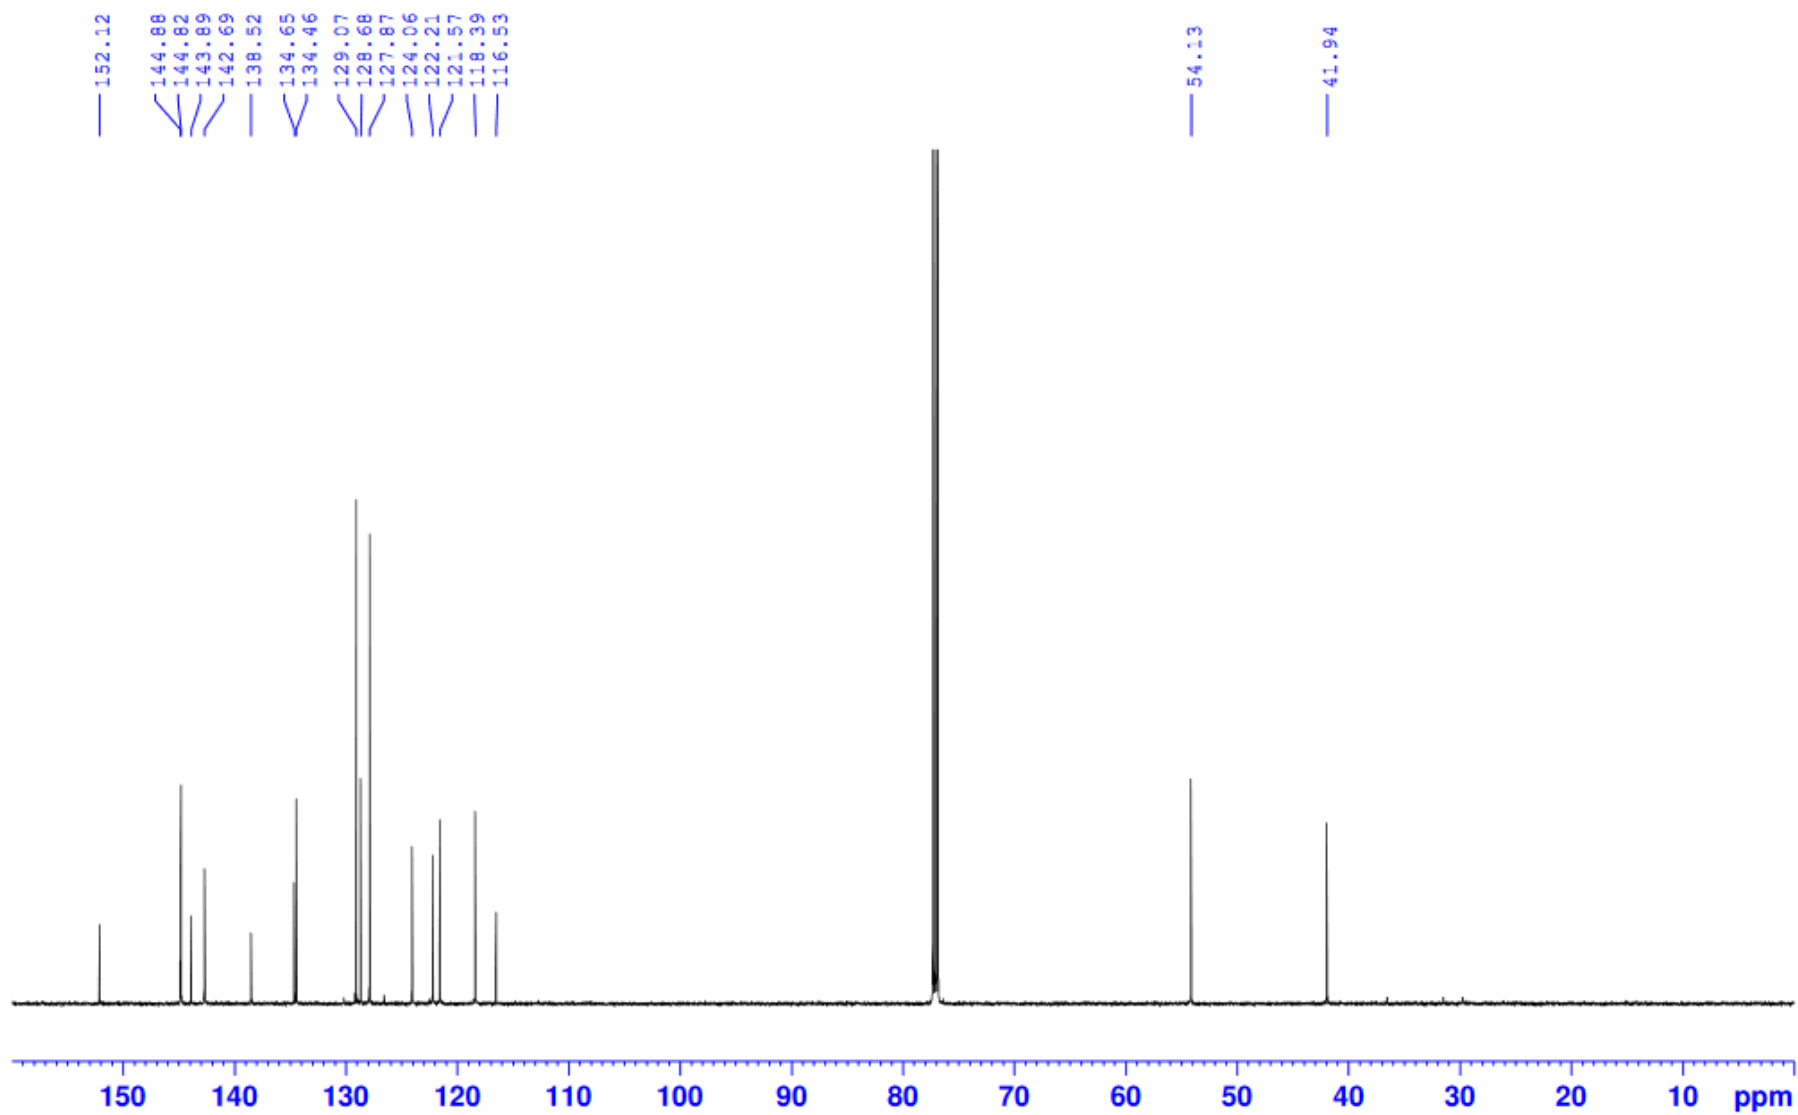

7.  $^{13}\text{C}$  NMR of 10-[(1-Benzyl-1H-1,2,3-triazol-4-yl)-methyl]-1,6-diazaphenothiazine (**1d**) – aromatic part

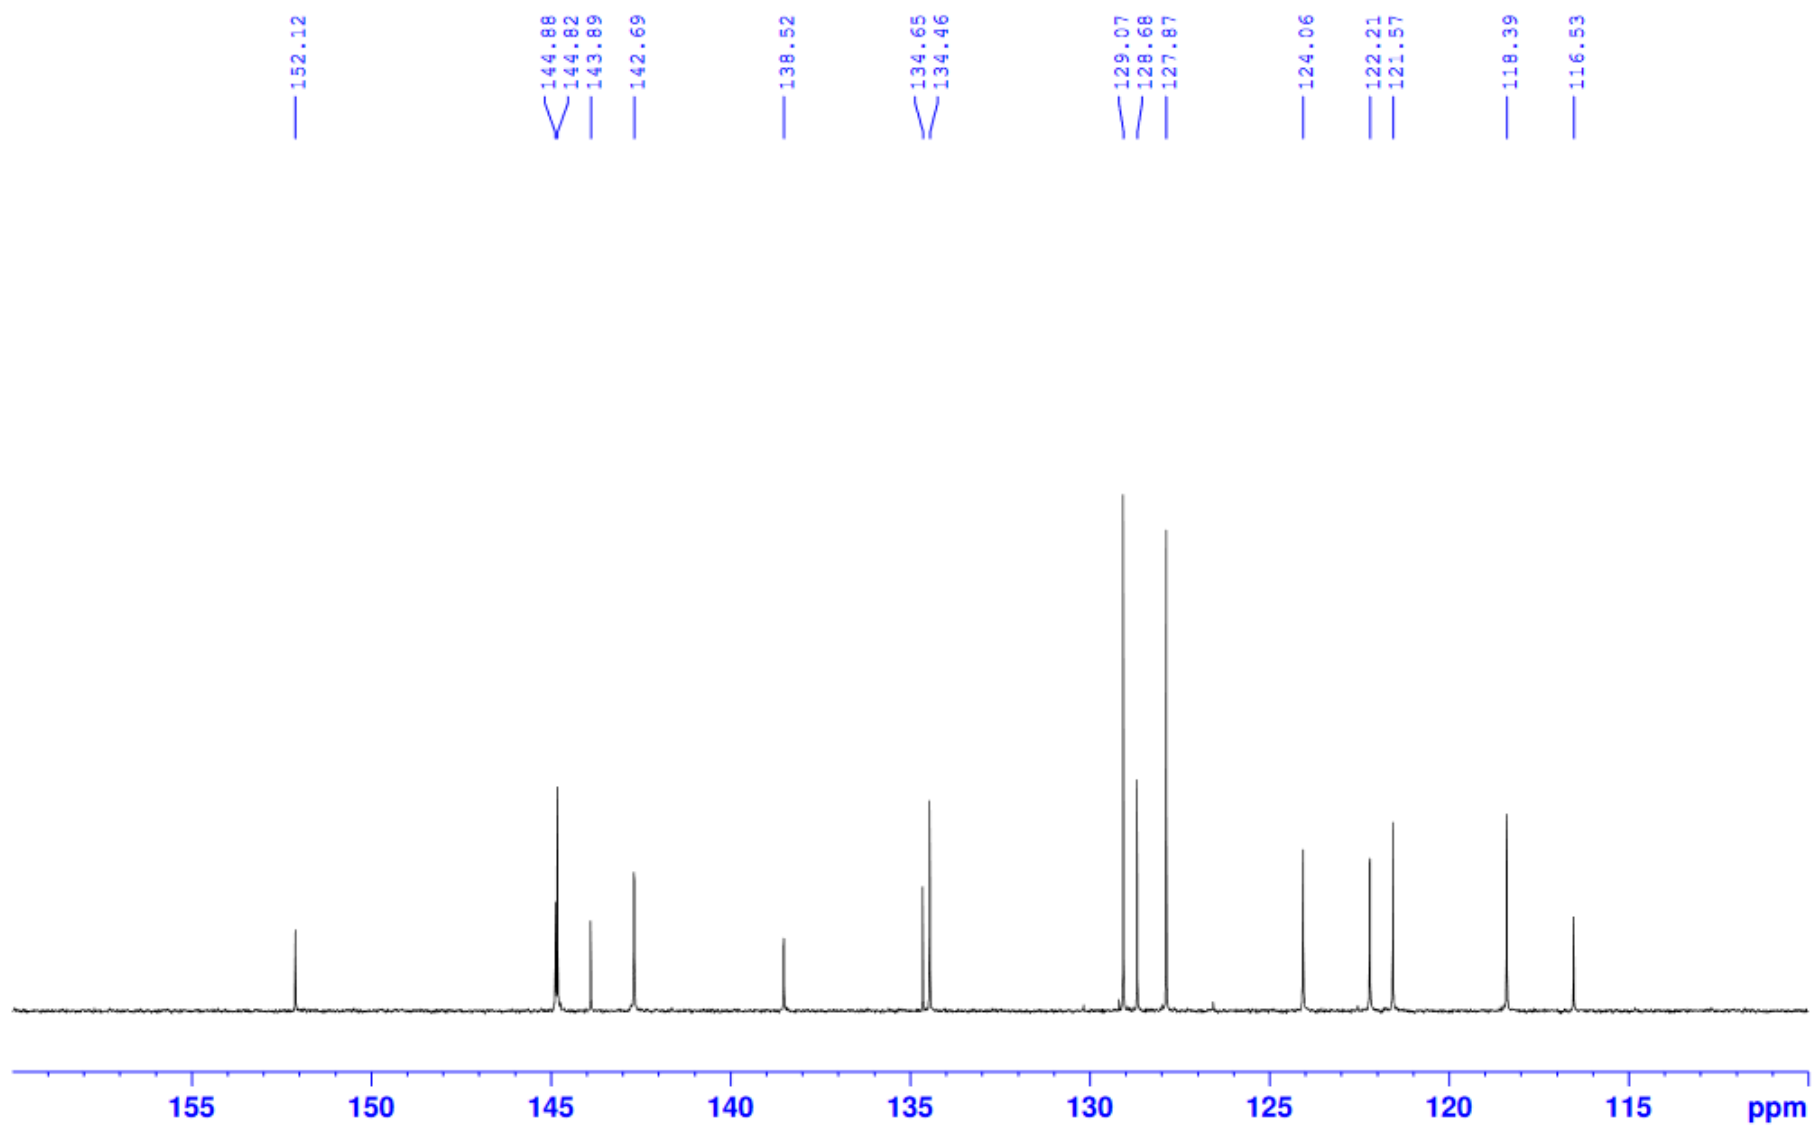



8. HR MS of 10-[(1-Benzyl-1H-1,2,3-triazol-4-yl)-methyl]-1,6-diazaphenothiazine (**1d**)

Compound Spectrum List Report

Analysis Info

Analysis Name D:\Data\BA78.d  
 Method low\_mass.m  
 Sample Name TM Low concentration  
 Comment

Acquisition Date 11/14/2017 12:55:17 PM

Operator KM  
 Instrument impact II 1825265.10082

Acquisition Parameter

|             |          |                      |          |                  |           |
|-------------|----------|----------------------|----------|------------------|-----------|
| Source Type | ESI      | Ion Polarity         | Positive | Set Nebulizer    | 0.3 Bar   |
| Focus       | Active   | Set Capillary        | 4000 V   | Set Dry Heater   | 240 °C    |
| Scan Begin  | 100 m/z  | Set End Plate Offset | -500 V   | Set Dry Gas      | 4.0 l/min |
| Scan End    | 1000 m/z | Set Charging Voltage | 2000 V   | Set Divert Valve | Source    |
|             |          | Set Corona           | 0 nA     | Set APCI Heater  | 0 °C      |

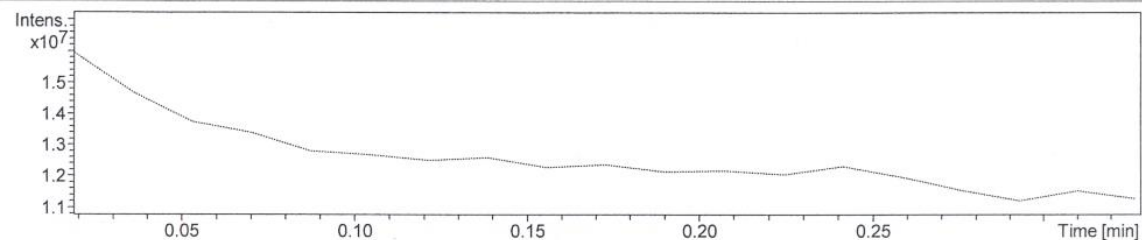

+MS, 0.0-0.3min #2-18

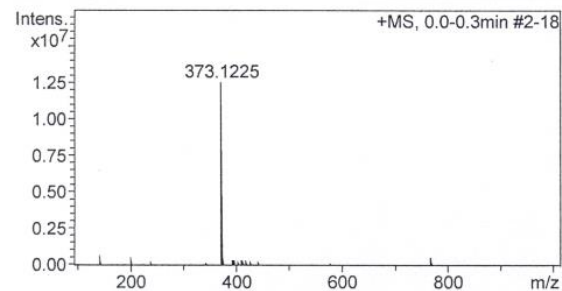

| # | m/z      | Res.  | S/N      | I        | I %   | FWHM   |
|---|----------|-------|----------|----------|-------|--------|
| 1 | 373.1225 | 43747 | 113088.6 | 12532882 | 100.0 | 0.0085 |
